# Supplementary material for: Enhanced CO oxidation on CeO2/Co3O4nanojunctions derived from annealing of metal organic frameworks
Source: Royal Society of Chemistry journal article supplement (doi:10.1039/c6nr07725k), 2016-01-01
Supplement: c6nr07725k1.pdf [file c6nr07725k1.pdf]

## Supporting Information

### Enhanced CO Oxidation on the CeO<sub>2</sub>/Co<sub>3</sub>O<sub>4</sub> nanojunctions derived from annealing of metal organic frameworks

Changlai Wang<sup>a</sup>, Dongdong Wang<sup>a</sup>, Yang Yang<sup>a</sup>, Ren Li<sup>a</sup>, Changle Chen<sup>b\*</sup> and  
Qianwang Chen<sup>a,c\*</sup>

<sup>a</sup>Department of Materials Science & Engineering, Hefei National Laboratory for Physical Science at Microscale & Collaborative Innovation Center of Suzhou Nano Science and Technology, University of Science and Technology of China, Hefei 230026, China

<sup>b</sup>Department of Polymer Science & Engineering, University of Science and Technology of China, Hefei 230031, China.

<sup>c</sup>High Magnetic Field Laboratory, Hefei Institutes of Physical Science, Chinese Academy of Sciences, Hefei 230031, China

\* Corresponding author

#### Material synthesis

The Co<sub>3</sub>O<sub>4</sub> used as reference was obtained by directly carbonization of Co<sub>3</sub>[Co(CN)<sub>6</sub>]<sub>2</sub>. The typical synthetic experiments of Co<sub>3</sub>[Co(CN)<sub>6</sub>]<sub>2</sub> were carried out as follows: Solution A: Co(CH<sub>3</sub>COO)<sub>2</sub>·nH<sub>2</sub>O (0.075 mmol, 18.7 mg) was dissolved in H<sub>2</sub>O (10 mL) under agitated stirring to obtain a transparent red solution. Solution B: K<sub>3</sub>[Co(CN)<sub>6</sub>]<sub>2</sub> (16.6 mg, 0.05 mmol) and PVP surfactant (0.3 g) were dissolved in distilled water (10 mL). Solution A was slowly and regularly added to solution B through a syringe to form a red colloid solution. The whole reaction was performed at room temperature with agitated stirring. After 10 min, the reaction was aged for 24 h at room temperature without any interruption. The resulting pink-colored precipitate was filtered and washed several times with distilled water and finally dried in air at 60 °C.

#### Calculation method

The calculations were based on density functional theory by using the Vienna

Ab-initio Simulation Package (VASP)<sup>1, 2</sup>. The core electrons were replaced by the projector augmented wave pseudopotentials and the valence electrons were described by plane wave basis sets<sup>3, 4</sup>. The electron–electron exchange and correlation functional was used the generalized gradient approximation (GGA)<sup>5</sup> method with Perdew-Burke-Ernzerhof (PBE)<sup>6</sup> functional. To ensure the accuracy of the calculated results, the cutoff energy was set to 400 eV for the plane-wave expansion of the electronic wave function. All structures were optimized with a convergence criterion of  $1 \times 10^{-5}$  eV for the energy and 0.01 eV/Å for the forces. Brillouin-zone integration was performed with  $5 \times 5 \times 1$  Monkhorst-Pack grid. The adsorption energy of the CO molecule was evaluated from:

$$E_{\text{ads}} = E_{\text{tot}} - (E_{\text{co}} + E_{\text{sur}})$$

Where  $E_{\text{tot}}$ ,  $E_{\text{co}}$  and  $E_{\text{sur}}$  are the energy of the total adsorbed system, CO molecule in the gas phase and the relaxed clean catalyst surface, respectively.

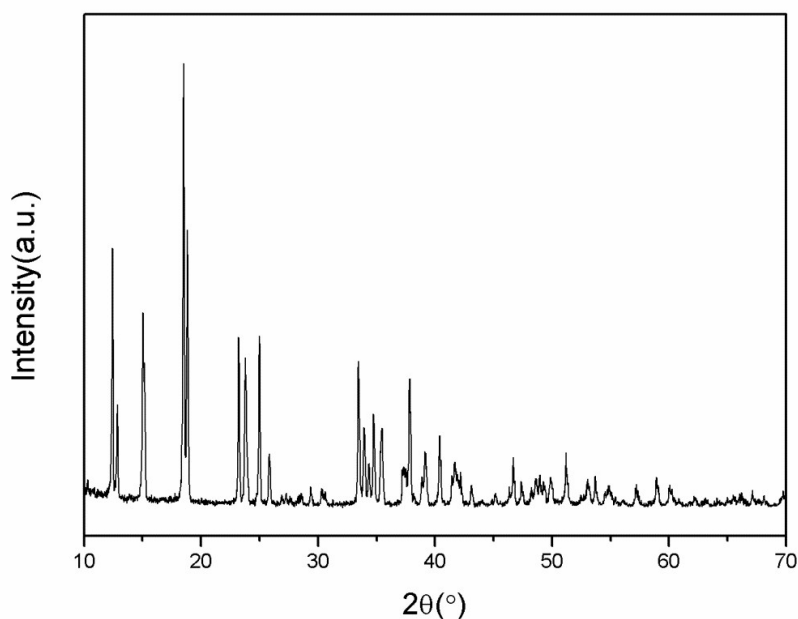

**Fig. S1** shows XRD patterns of the resulting Ce[Co(CN)<sub>6</sub>], which is similar to La[Co(CN)<sub>6</sub>].

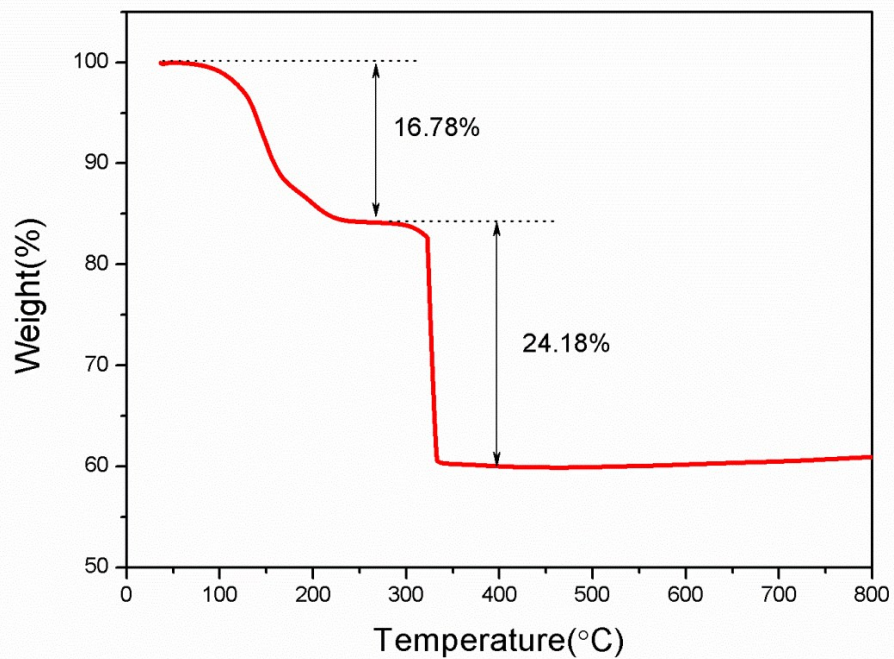

**Fig. S2** TGA curves of the Ce[Co(CN)<sub>6</sub>].

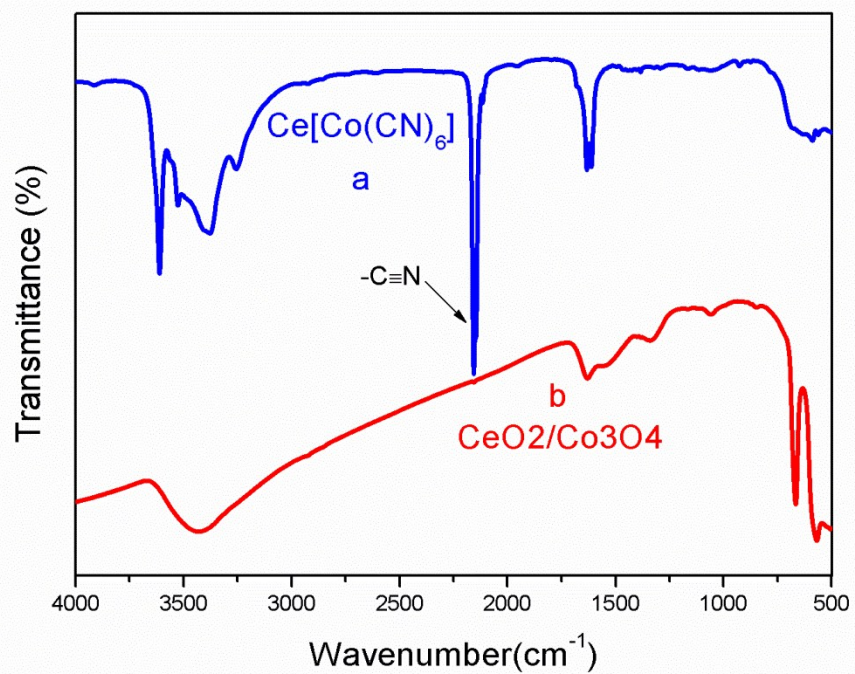

**Fig. S3** FTIR spectra of (a) the Ce[Co(CN)<sub>6</sub>] precursor and (b) the CeO<sub>2</sub>/Co<sub>3</sub>O<sub>4</sub> nanojunctions.

**Fig. S3** shows the FTIR spectra of the  $\text{Ce}[\text{Co}(\text{CN})_6]$  precursor and the  $\text{CeO}_2/\text{Co}_3\text{O}_4$  nanojunctions, respectively. The FTIR spectrum of the  $\text{Ce}[\text{Co}(\text{CN})_6]$  precursor exhibits a dominant peak at  $2158\text{ cm}^{-1}$ , which is attributed to  $-\text{C}\equiv\text{N}-$  stretching vibration. The characteristic peak at  $1610\text{ cm}^{-1}$  arises from  $\text{C}=\text{O}$  stretching of the poly(vinylpyrrolidone) (PVP) amide unit<sup>7</sup> and the peak located at  $3386\text{ cm}^{-1}$  is related to the  $\nu(\text{O}-\text{H})$  of the crystal water<sup>8</sup>. As we can see from the FTIR spectrum of the  $\text{CeO}_2/\text{Co}_3\text{O}_4$  nanojunctions, the peak of  $-\text{C}\equiv\text{N}-$  stretching vibration disappears, indicating MOF has been totally decomposed during the annealing process, that is to say, there is no MOF residual in the as-prepared  $\text{CeO}_2/\text{Co}_3\text{O}_4$  nanojunctions. And the peak located at  $3430\text{ cm}^{-1}$  is possibly attributed to the hydroxyl groups in the sample or absorbed water molecules<sup>9</sup>, which is consistent with the results of XPS (Fig. 3a).

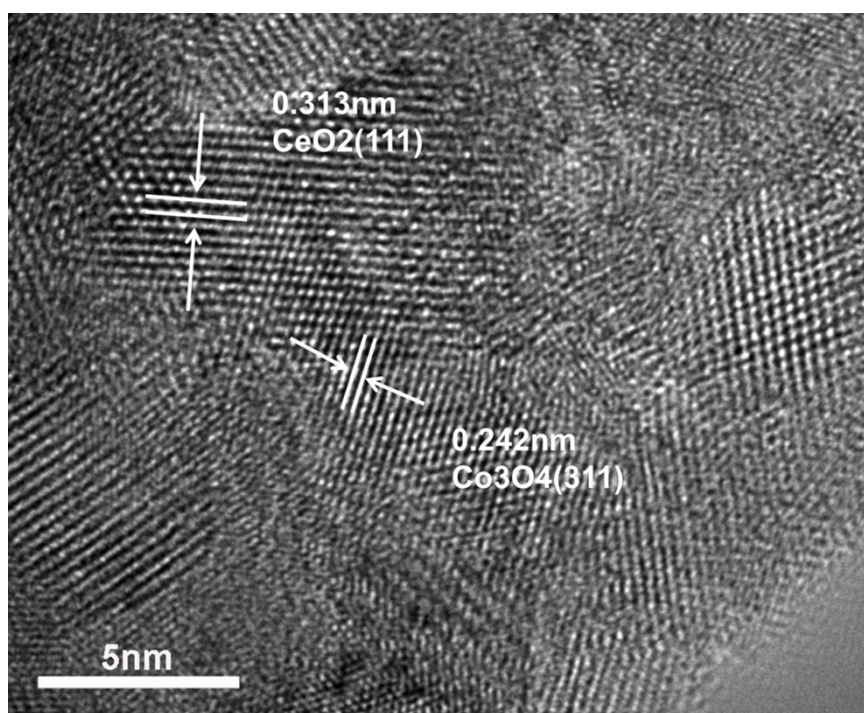

**Fig. S4** HRTEM image of the porous  $\text{CeO}_2/\text{Co}_3\text{O}_4$  nanojunctions.

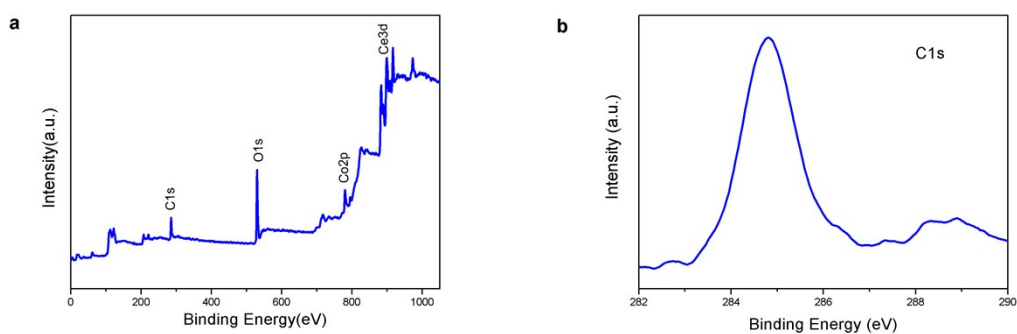

**Fig. S5** XPS spectra of the as-prepared porous  $\text{CeO}_2/\text{Co}_3\text{O}_4$  nanojunctions: (a) survey spectrum, (b) C 1s binding energy spectrum.

The existence of C is possibly derived from carbonization of the  $-\text{C}\equiv\text{N}-$  linker in the MOF, and it can be also considered to be beneficial to avoid the aggregation of in situ generated nanometer-sized  $\text{CeO}_2/\text{Co}_3\text{O}_4$  nanojunctions, which are uniformly distributed in the whole hexagonal structure.

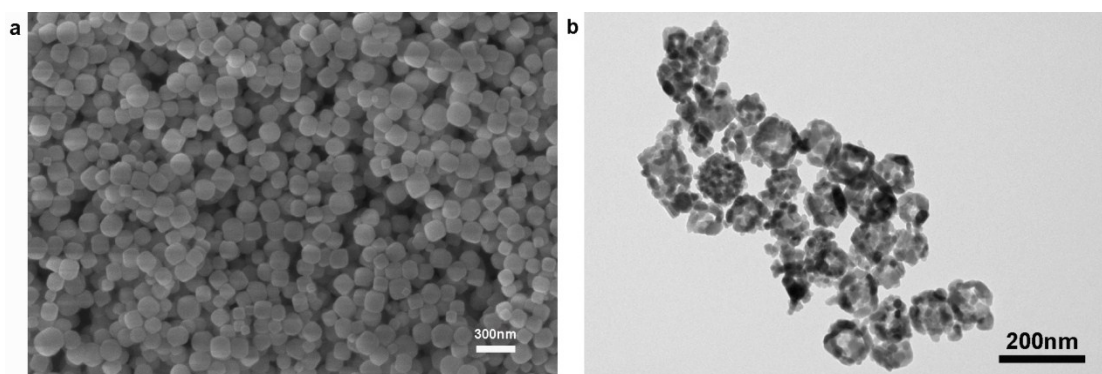

**Fig. S6** (a) SEM image of the  $\text{Co}_3[\text{Co}(\text{CN})_6]_2$ , (b) TEM image of pure  $\text{Co}_3\text{O}_4$

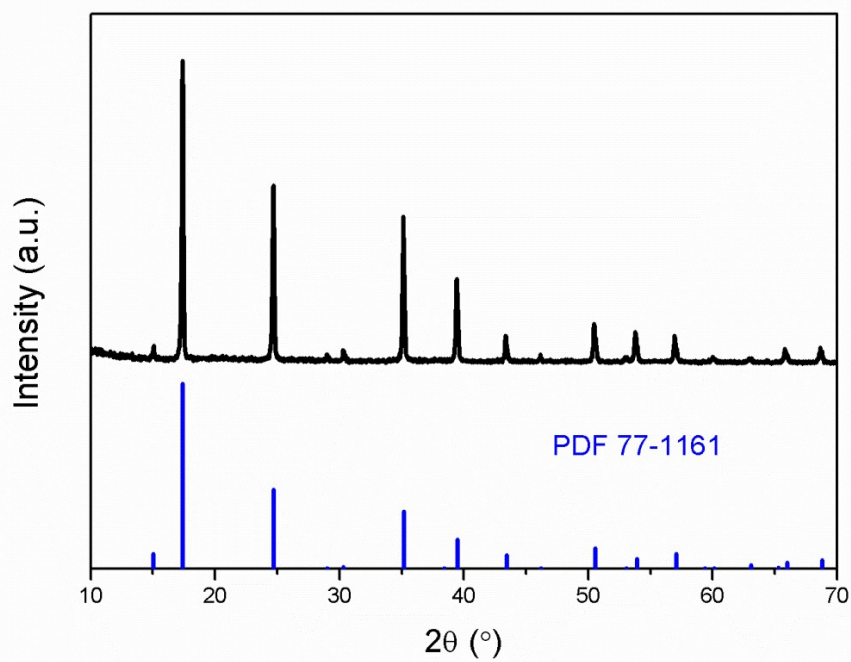

**Fig. S7** The XRD pattern of  $\text{Co}_3[\text{Co}(\text{CN})_6]_2$

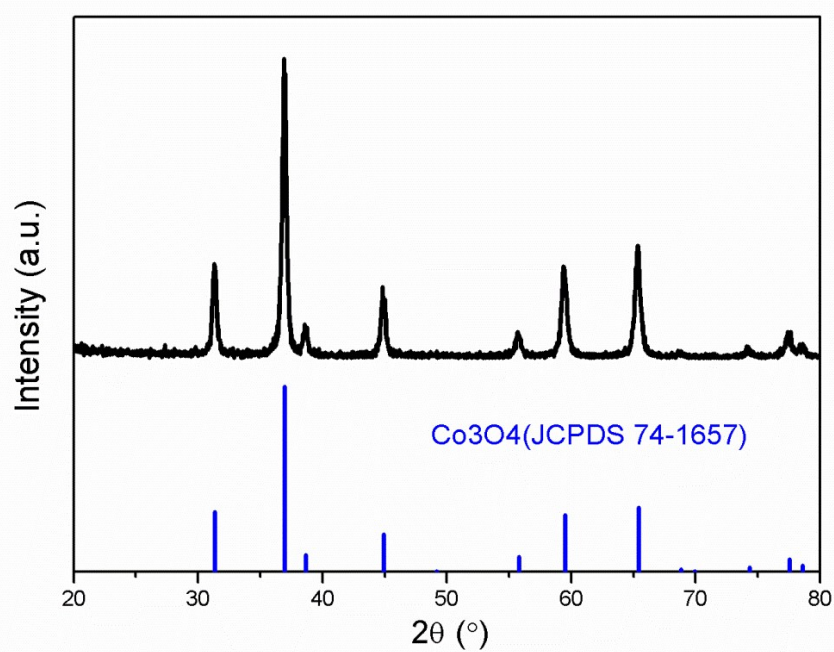

**Fig. S8** The XRD patterns of pure  $\text{Co}_3\text{O}_4$ .

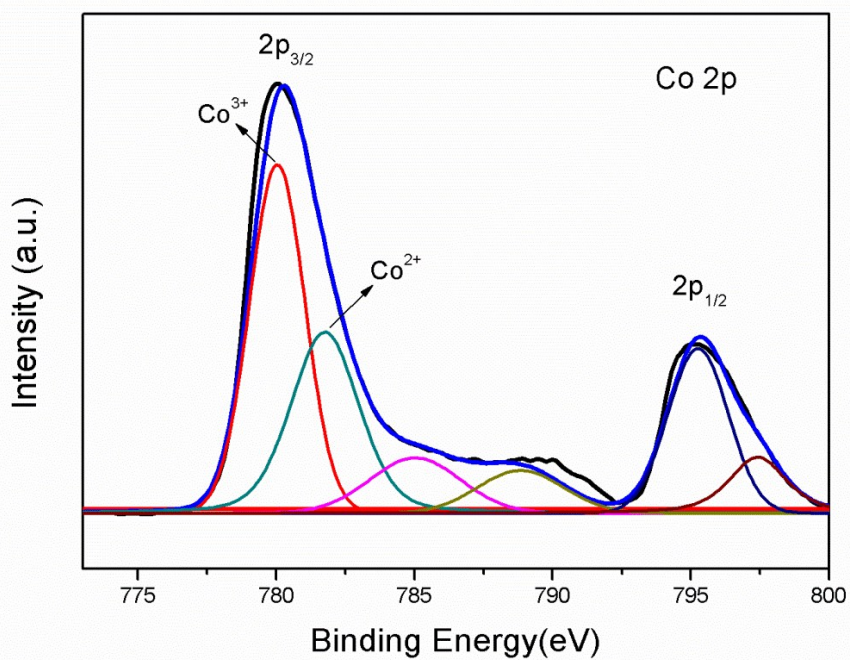

**Fig. S9** Co 2p binding energy spectrum of pure  $\text{Co}_3\text{O}_4$

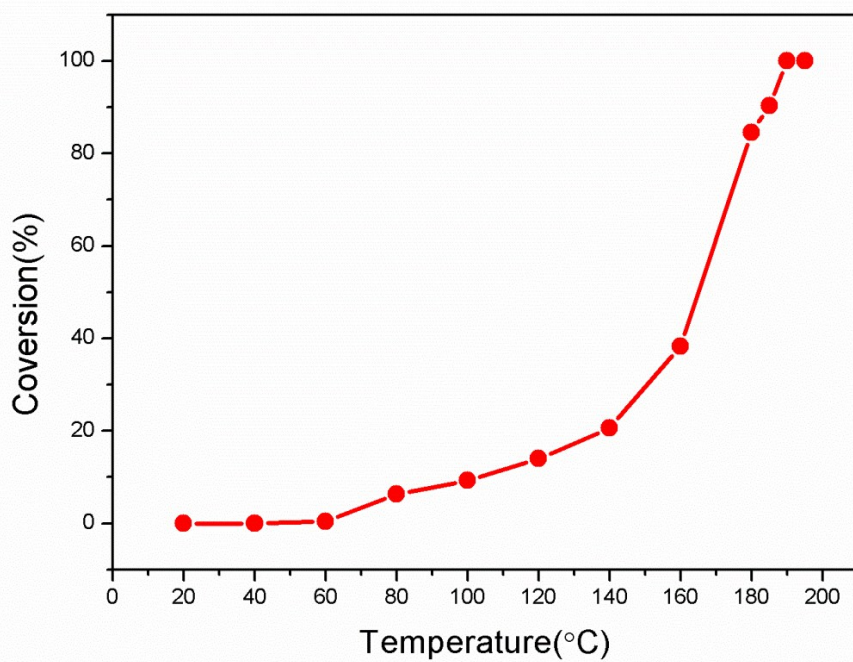

**Fig. S10** Conversion as a function of temperature for CO oxidation over rare  $\text{Co}_3\text{O}_4$ .

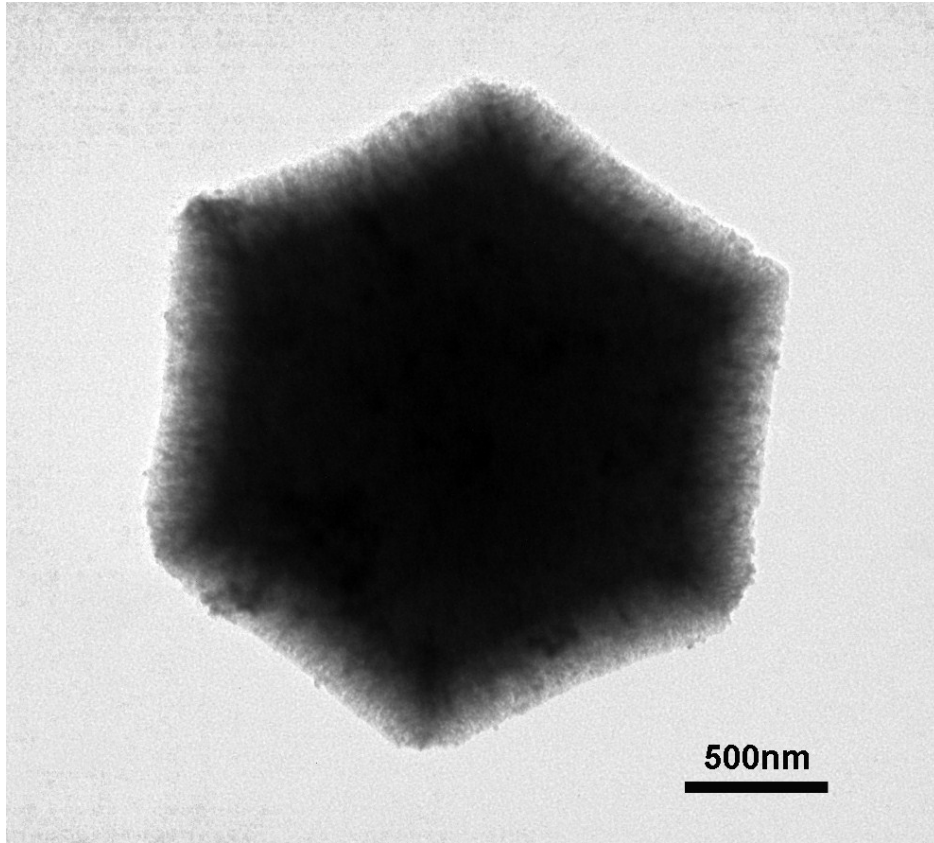

**Fig. S11** The TEM image of porous  $\text{CeO}_2/\text{Co}_3\text{O}_4$  nanojunctions after the CO oxidation test.

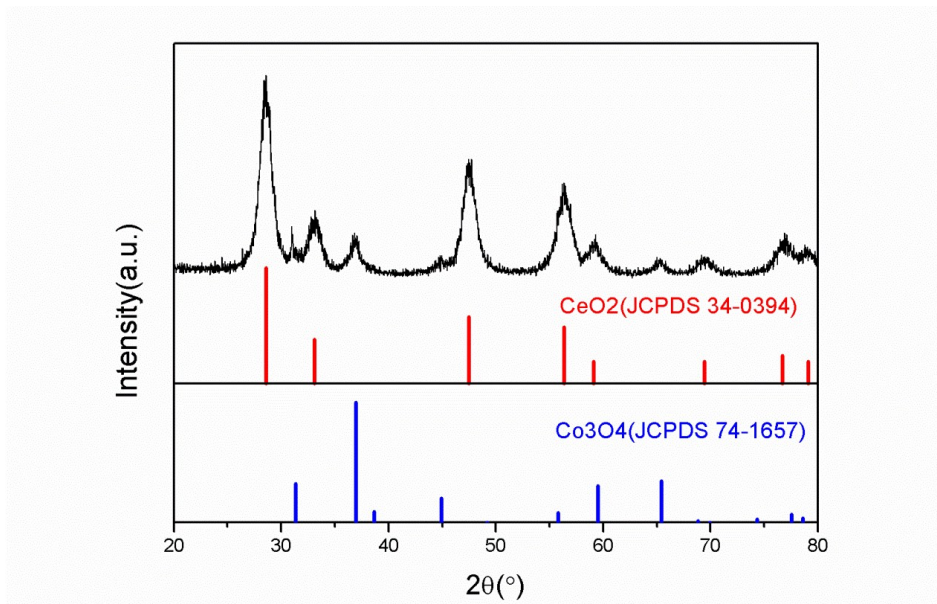

**Fig. S12** The XRD pattern of porous  $\text{CeO}_2/\text{Co}_3\text{O}_4$  nanojunctions after the CO oxidation test.



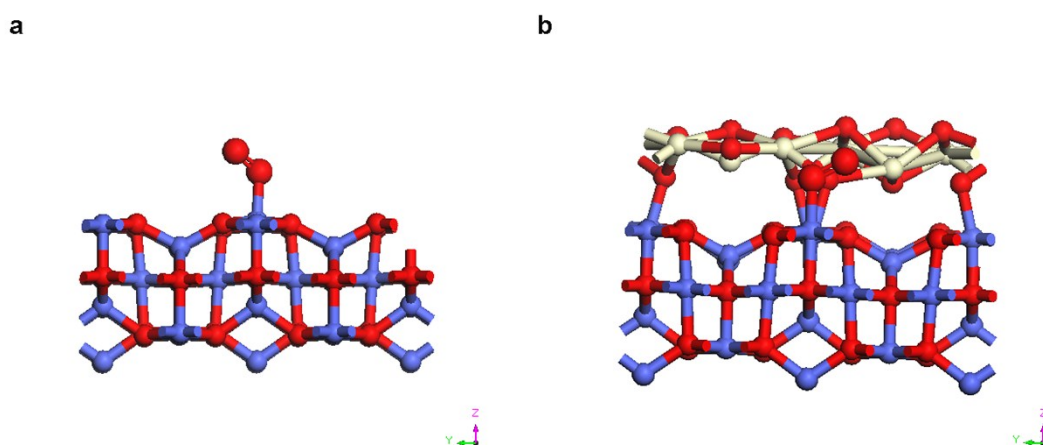

**Fig. S13** Schematic structure of O<sub>2</sub> adsorbed on (a) the Co<sub>3</sub>O<sub>4</sub> (110) surface and (b) the interface of CeO<sub>2</sub>/Co<sub>3</sub>O<sub>4</sub>.

**Table S1** The comparison of the catalytic properties for CO oxidation of some related catalysts and our porous CeO<sub>2</sub>/Co<sub>3</sub>O<sub>4</sub> nanojunctions.

| catalysts                                                                | CO/% | T <sub>100</sub> /°C | Reference                                                   |
|--------------------------------------------------------------------------|------|----------------------|-------------------------------------------------------------|
| porous<br>CeO <sub>2</sub> /Co <sub>3</sub> O <sub>4</sub> nanojunctions | 1    | 110                  | This work                                                   |
| Co <sub>3</sub> O <sub>4</sub> @CeO <sub>2</sub> nanowire                | 1    | 160                  | Nano Research,<br>2015, 8(6): 1944-<br>1955.                |
| Co <sub>3</sub> O <sub>4</sub> @CeO <sub>2</sub> cubes                   | 1    | 190                  | Chem. Eur. J.<br>2014, 20, 4469–<br>4473                    |
| ZnCo <sub>2</sub> O <sub>4</sub> @CeO <sub>2</sub> spheres               | 1    | 200                  | ACS Appl.<br>Mater. Interfaces<br>2014, 6, 22216 –<br>22223 |
| CeO <sub>2</sub> -ZnO composite<br>hollow microsphere                    | 0.5  | 300                  | ACS Appl. Mater.<br>Interfaces 2014,<br>6, 421 – 428        |
| CeO <sub>2</sub> nanorods                                                | 1    | 292                  | J. Mater. Chem.<br>A 2014, 2,<br>16459–16466                |
| CeO <sub>2</sub> -ZnO                                                    | 1    | 260                  | Materials Letters<br>2016, 181, 161–                        |

**Table S2** The comparison of the catalytic properties for CO oxidation of our porous CeO<sub>2</sub>/Co<sub>3</sub>O<sub>4</sub> nanojunctions with some noble metals.

| catalysts                                                             | CO/% | T <sub>100</sub> /°C | Reference                                                   |
|-----------------------------------------------------------------------|------|----------------------|-------------------------------------------------------------|
| porous CeO <sub>2</sub> /Co <sub>3</sub> O <sub>4</sub> nanojunctions | 1    | 110                  | This work                                                   |
| Pt@C/SiO <sub>2</sub>                                                 | 1    | 138                  | Carbon, 2016, 101, 324-330.                                 |
| Pd/ZnO                                                                | 1    | 160                  | Nano Res. 2011, 4(1): 83-91                                 |
| Pd-TiO <sub>2</sub>                                                   | 1    | >200                 | Progress in Natural Science: Materials International, 2016. |

**Table S3** The comparison of O-O bond length for O<sub>2</sub> molecule and adsorbed O<sub>2</sub> on the Co<sub>3</sub>O<sub>4</sub> (110) surface and the interface of CeO<sub>2</sub>/Co<sub>3</sub>O<sub>4</sub> nanojunctions.

|                    | O <sub>2</sub> | Co <sub>3</sub> O <sub>4</sub> (110)-O <sub>2</sub> | CeO <sub>2</sub> /Co <sub>3</sub> O <sub>4</sub> -O <sub>2</sub> |
|--------------------|----------------|-----------------------------------------------------|------------------------------------------------------------------|
| O-O bond length[Å] | 1.236          | 1.282                                               | 1.287                                                            |

### References

1. G. Kresse and J. Furthmüller, *Phys. Rev. B*, 1996, **54**, 11169.
2. G. Kresse and J. Hafner, *Phys. Rev. B*, 1993, **48**, 13115.
3. P. E. Blöchl, *Phys. Rev. B*, 1994, **50**, 17953.
4. G. Kresse and D. Joubert, *Phys. Rev. B*, 1999, **59**, 1758.
5. M. P. Teter, M. C. Payne and D. C. Allan, *Phys. Rev. B*, 1989, **40**, 12255.
6. J. P. Perdew, K. Burke and M. Ernzerhof, *Phys. Rev. Lett.*, 1996, **77**, 3865.
7. L. Hu, N. Yan, Q. Chen, P. Zhang, H. Zhong, X. Zheng, Y. Li and X. Hu, *Chem. Eur. J.*, 2012, **18**, 8971-8977.
8. F. Zheng, D. Zhu, X. Shi and Q. Chen, *J. Mater. Chem. A*, 2015, **3**, 2815-2824.
9. K. Babitha, A. Sreedevi, K. Priyanka, B. Sabu and T. Varghese, *Indian J. Pure Appl. Phys.*, 2015, **53**, 596-603.
